# Supplementary material for: Increased Gene Expression of RUNX2 and SOX9 in Mesenchymal Circulating Progenitors Is Associated with Autophagy during Physical Activity
Source: Oxid Med Cell Longev. 2019 Oct 15;2019:8426259. doi: 10.1155/2019/8426259 (PMC6815530; doi:10.1155/2019/8426259)
Supplement: Supplementary Materials — Supplemental Table 1: osteogenic Array analyses. Supplemental Table 2: telomerase related genes analyses. Figure 1S: RT real-time PCR data: expression of osteogenic genes in control samples obtained at time 0 and after 2 hrs. Figure 2S: RT real-time PCR data: expression of adipogenic genes in control samples obtained at time 0 and after 2 hrs. Figure 3S: expression of osteogenic (RUNX2), adipogenic (PPARG2), or chondrogenic (SOX9) transcription factors (A) and Alizarin red staining (B) in the MSC line treated with control sera. Figure 4S: RT real-time PCR data: expression of telomerase-related genes in control samples obtained at time 0 and after 2 hrs. Figure 5S: RT real-time PCR data: expression of autophagy-related genes in control samples obtained at time 0 and after 2 hrs. [file 8426259.f1.zip]

Archive with 3 entries (3 files):
- mat.8426259.v3.pptx
- Supplemental Table 1.docx
- Supplemental Table 2.docx
